# Supplementary material
Source: Springer Nature journal article supplement (https://www.springermedizin.de/resource/supplementary/12943_2013_1484_MOESM10_ESM.pdf/9553124)

**A**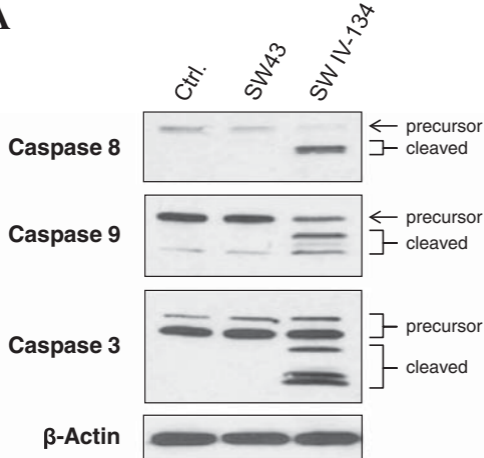**B**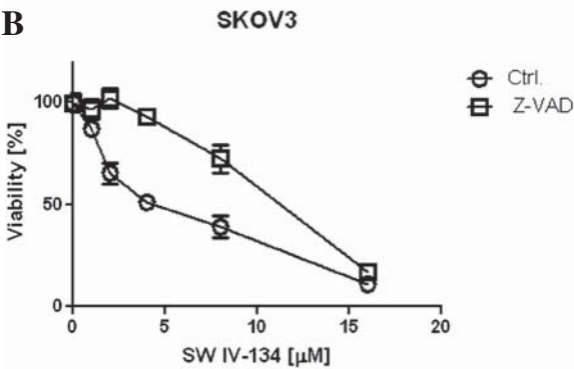

Supplement: MOESM10 [file 9553124]
